# Supplementary material for: Extension of the general unit hydrograph theory for the spread of salinity in estuaries
Source: Copernicus journal article supplement (doi:10.5194/os-19-603-2023), 2023-05-11
Supplement: Supplementary file 1 [file os-19-603-2023-supplement.zip]

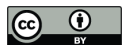

## *Supplement of*

# **Extension of the general unit hydrograph theory for the spread of salinity in estuaries**

**Huayang Cai et al.**

*Correspondence to:* Erwan Garel (egarel@ualg.pt)

- os-19-603-2023-supplement-title-page.pdf
- FigureS1.png
- FigureS2.png
- FigureS3.png
- FigureS4.png
- FigureS5.png
- FigureS6.png
- FigureS7.png
- FigureS8.png
- FigureS9.emf

The copyright of individual parts of the supplement might differ from the article licence.
